# Supplementary material for: Drug-induced changes in connectivity to midbrain dopamine cells revealed by rabies monosynaptic tracing
Source: eLife. 2026 May 15;13:RP93664. doi: 10.7554/eLife.93664 (PMC13179063; doi:10.7554/eLife.93664)
Supplement: Supplementary file 1. [file elife-93664-supp1.xlsx]

## Sheet: Sheet1
Condition	Main Figures	Supplemental Figures
DAT-Cre saline 1	Figures 1-6	5S1, S4
DAT-Cre saline 2	Figures 1-6	5S1, S4
DAT-Cre saline 3	Figures 1-6	5S1, S4
DAT-Cre saline 4	Figures 1-6	5S1, S4
DAT-Cre saline 5	Figures 1-2
DAT-Cre saline 6	Figures 1-2
DAT-Cre saline 7	Figures 1-2
DAT-Cre saline 8	Figures 1-2
vGluT2-Cre saline 1	Figures 1-2
vGluT2-Cre saline 2	Figures 1-2
vGluT2-Cre saline 3	Figures 1-2
vGluT2-Cre saline 4	Figures 1-2
vGluT2-Cre saline 5	Figures 1-2
vGluT2-Cre saline 6	Figures 1-2
vGluT2-Cre saline 7	Figures 1-2
GAD2-Cre saline 1	Figures 1-2, 5-6	5S1
GAD2-Cre saline 2	Figures 1-2, 5-6	5S1
GAD2-Cre saline 3	Figures 1-2, 5-6	5S1
GAD2-Cre saline 4	Figures 1-2, 5-6	5S1
GAD2-Cre saline 5	Figures 1-2, 5-6	5S1
GAD2-Cre saline 6	Figures 1-2, 5-6	5S1
GAD2-Cre saline 7	Figures 1-2, 5-6	5S1
GAD2-Cre saline 8	Figures 1-2, 5-6	5S1
GAD2-Cre saline 9	Figures 1-2, 5-6	5S1
GAD2-Cre saline 10	Figures 1-2, 5-6	5S1
GAD2-Cre saline 11	Figures 1-2, 5-6	5S1
GAD2-Cre saline 12	Figures 1-2, 5-6	5S1
GAD2-Cre saline 13	Figures 1-2, 5-6	5S1
DAT-Cre K/X 1	Figures 5-7	5S1, 7S1, 9S2
DAT-Cre K/X 2	Figures 5-7	5S1, 7S1, 9S2
DAT-Cre K/X 3	Figures 5-7	5S1, 7S1, 9S2
DAT-Cre K/X 4	Figures 5-7	5S1, 7S1, 9S2
DAT-Cre cocaine 1	Figures 3-6, 9	5S1, 9S1
DAT-Cre cocaine 2	Figures 3-6, 9	5S1, 9S1
DAT-Cre cocaine 3	Figures 3-6, 9	5S1, 9S1
DAT-Cre cocaine 4	Figures 3-6, 9	5S1, 9S1
DAT-Cre cocaine 5	Figures 3-6, 9	5S1, 9S1
DAT-Cre amphetamine 1	Figures 3-6, 9	5S1, 9S1
DAT-Cre amphetamine 2	Figures 3-6, 9	5S1, 9S1
DAT-Cre amphetamine 3	Figures 3-6, 9	5S1, 9S1
DAT-Cre amphetamine 4	Figures 3-6, 9	5S1, 9S1
DAT-Cre amphetamine 5	Figures 3-6, 9	5S1, 9S1
DAT-Cre nicotine 1	Figures 3-6, 9	5S1, 9S1
DAT-Cre nicotine 2	Figures 3-6, 9	5S1, 9S1
DAT-Cre nicotine 3	Figures 3-6, 9	5S1, 9S1
DAT-Cre nicotine 4	Figures 3-6, 9	5S1, 9S1
DAT-Cre nicotine 5	Figures 3-6, 9	5S1, 9S1
DAT-Cre morphine 1	Figures 3-6, 9	5S1, 9S1
DAT-Cre morphine 2	Figures 3-6, 9	5S1, 9S1
DAT-Cre morphine 3	Figures 3-6, 9	5S1, 9S1
DAT-Cre morphine 4	Figures 3-6, 9	5S1, 9S1
DAT-Cre morphine 5	Figures 3-6, 9	5S1, 9S1
DAT-Cre fluoxetine 1	Figures 3-7	5S1, 8S3, 9S3
DAT-Cre fluoxetine 2	Figures 3-7	5S1, 8S3, 9S3
DAT-Cre fluoxetine 3	Figures 3-7	5S1, 8S3, 9S3
DAT-Cre fluoxetine 4	Figures 3-7	5S1, 8S3, 9S3
DAT-Cre fluoxetine 5	Figures 3-7	5S1, 8S3, 9S3
DAT-Cre methamphetamine 1	Figures 3-6, 9	S3, S7, S8, S10
DAT-Cre methamphetamine 2	Figures 3-6, 9	S3, S7, S8, S10
DAT-Cre methamphetamine 3	Figures 3-6, 9	S3, S7, S8, S10
DAT-Cre methamphetamine 4	Figures 3-6, 9	S3, S7, S8, S10
GAD2-Cre cocaine 1	Figures 5-6	5S1
GAD2-Cre cocaine 2	Figures 5-6	5S1
GAD2-Cre cocaine 3	Figures 5-6	5S1
GAD2-Cre cocaine 4	Figures 5-6	5S1
DAT-Cre cTRIO NAcMed cocaine 1	Figure 7	7S1, 7S2, 7S3
DAT-Cre cTRIO NAcMed cocaine 2	Figure 7	7S1, 7S2, 7S3
DAT-Cre cTRIO NAcMed cocaine 3	Figure 7	7S1, 7S2, 7S3
DAT-Cre cTRIO NAcMed cocaine 4	Figure 7	7S1, 7S2, 7S3
DAT-Cre cTRIO NAcMed cocaine 5	Figure 7	7S1, 7S2, 7S3
DAT-Cre cTRIO NAcMed saline 1	Figure 7	7S1, 7S2, 7S3
DAT-Cre cTRIO NAcMed saline 2	Figure 7	7S1, 7S2, 7S3
DAT-Cre cTRIO NAcMed saline 3	Figure 7	7S1, 7S2, 7S3
DAT-Cre cTRIO NAcMed saline 4	Figure 7	7S1, 7S2, 7S3
DAT-Cre cTRIO NAcMed K/X 1	Figure 7	7S1, 7S2, 7S3
DAT-Cre cTRIO NAcMed K/X 2	Figure 7	7S1, 7S2, 7S3
DAT-Cre cTRIO NAcMed K/X 3	Figure 7	7S1, 7S2, 7S3
DAT-Cre cTRIO NAcMed K/X 4	Figure 7	7S1, 7S2, 7S3
DAT-Cre cTRIO NAcLat cocaine 1	Figure 7	7S1, 7S3
DAT-Cre cTRIO NAcLat cocaine 2	Figure 7	7S1, 7S3
DAT-Cre cTRIO NAcLat cocaine 3	Figure 7	7S1, 7S3
DAT-Cre cTRIO NAcLat cocaine 4	Figure 7	7S1, 7S3
DAT-Cre cTRIO NAcLat cocaine 5	Figure 7	7S1, 7S3
DAT-Cre cTRIO NAcLat saline 1	Figure 7	7S1, 7S3
DAT-Cre cTRIO NAcLat saline 2	Figure 7	7S1, 7S3
DAT-Cre cTRIO NAcLat saline 3	Figure 7	7S1, 7S3
DAT-Cre cTRIO NAcLat saline 4	Figure 7	7S1, 7S3
DAT-Cre cTRIO NAcLat K/X 1	Figure 7	7S1, 7S3
DAT-Cre cTRIO NAcLat K/X 2	Figure 7	7S1, 7S3
DAT-Cre cTRIO NAcLat K/X 3	Figure 7	7S1, 7S3
DAT-Cre cTRIO NAcLat K/X 4	Figure 7	7S1, 7S3
DAT-Cre cTRIO mPFC saline 1	Figure 7	7S1, 7S2, 7S3
DAT-Cre cTRIO mPFC saline 2	Figure 7	7S1, 7S2, 7S3
DAT-Cre cTRIO mPFC saline 3	Figure 7	7S1, 7S2, 7S3
DAT-Cre cTRIO mPFC saline 4	Figure 7	7S1, 7S2, 7S3
DAT-Cre cTRIO mPFC cocaine 1	Figure 7	7S1, 7S2, 7S3
DAT-Cre cTRIO mPFC cocaine 2	Figure 7	7S1, 7S2, 7S3
DAT-Cre cTRIO mPFC cocaine 3	Figure 7	7S1, 7S2, 7S3
DAT-Cre cTRIO mPFC cocaine 4	Figure 7	7S1, 7S2, 7S3
DAT-Cre cTRIO mPFC K/X 1	Figure 7	7S1, 7S2, 7S3
DAT-Cre cTRIO mPFC K/X 2	Figure 7	7S1, 7S2, 7S3
DAT-Cre cTRIO mPFC K/X 3	Figure 7	7S1, 7S2, 7S3
DAT-Cre cTRIO mPFC K/X 4	Figure 7	7S1, 7S2, 7S3
DAT-Cre cTRIO mPFC K/X 5	Figure 7	7S1, 7S2, 7S3
DAT-Cre cTRIO Amygdala cocaine 1	Figure 7	7S1, 7S3
DAT-Cre cTRIO Amygdala cocaine 2	Figure 7	7S1, 7S3
DAT-Cre cTRIO Amygdala cocaine 3	Figure 7	7S1, 7S3
DAT-Cre cTRIO Amygdala cocaine 4	Figure 7	7S1, 7S3
DAT-Cre cTRIO Amygdala cocaine 5	Figure 7	7S1, 7S3
DAT-Cre cTRIO Amygdala saline 1	Figure 7	7S1, 7S3
DAT-Cre cTRIO Amygdala saline 2	Figure 7	7S1, 7S3
DAT-Cre cTRIO Amygdala saline 3	Figure 7	7S1, 7S3
DAT-Cre cTRIO Amygdala saline 4	Figure 7	7S1, 7S3
DAT-Cre cTRIO Amygdala K/X 1	Figure 7	7S1, 7S3
DAT-Cre cTRIO Amygdala K/X 2	Figure 7	7S1, 7S3
DAT-Cre cTRIO Amygdala K/X 3	Figure 7	7S1, 7S3
DAT-Cre cTRIO Amygdala K/X 4	Figure 7	7S1, 7S3
DAT-Cre cTRIO Amygdala K/X 5	Figure 7	7S1, 7S3
