# Supplementary material for: Drug-induced changes in connectivity to midbrain dopamine cells revealed by rabies monosynaptic tracing
Source: eLife. 2026 May 15;13:RP93664. doi: 10.7554/eLife.93664 (PMC13179063; doi:10.7554/eLife.93664)
Supplement: Supplementary file 2. [file elife-93664-supp2.xlsx]

## Sheet: Bea_Supp_table_2_PCA_stats (1)
Figure	Principal Component	group1	group2	Diff	Lower	Upper	p-value	test
1E	1	DAT-Cre	Gad2-Cre	3.22217	0.758985	5.68535	0.00871895	ANOVA followed by Tukey
1E	1	DAT-Cre	vGluT2-Cre	1.37785	-1.45912	4.21482	0.460375	ANOVA followed by Tukey
1E	1	Gad2-Cre	vGluT2-Cre	1.84432	-0.72547	4.41411	0.194334	ANOVA followed by Tukey
1F	2	DAT-Cre	Gad2-Cre	0.701416	-1.2708	2.67364	0.6541	ANOVA followed by Tukey
1F	2	DAT-Cre	vGluT2-Cre	2.7512	0.479689	5.0227	0.015448	ANOVA followed by Tukey
1F	2	Gad2-Cre	vGluT2-Cre	2.04978	-0.00779994	4.10736	0.0510121	ANOVA followed by Tukey
3D	1	Control isoflurane anesthesia	Fluoxetine	0.705515	-4.25596	5.66699	0.74654	unpaired t test, two-tailed
3E	2	Control isoflurane anesthesia	Fluoxetine	0.438981	-3.10027	3.97824	0.777805	unpaired t test, two-tailed
3F	3	Control isoflurane anesthesia	Fluoxetine	0.331791	-2.87254	3.53612	0.8136	unpaired t test, two-tailed
3J	1	Control	Drugs	0.256635	-1.63346	2.14673	0.783678	unpaired t test, two-tailed
3K	2	Control	Drugs	2.57859	1.14408	4.0131	0.000915179	unpaired t test, two-tailed
3L	3	Control	Drugs	1.39291	0.197646	2.58817	0.0238223	unpaired t test, two-tailed
5B	1	Drugs	Control ketamine anesthesia	1.746112786575628	-0.789213	4.28144	0.3053966483033811	ANOVA followed by Tukey
5B	1	Drugs	Control isoflurane anesthesia	1.9003195980235061	-0.635006	4.435645005975588	0.22716376393404036	ANOVA followed by Tukey
5B	1	Drugs	Fluoxetine	1.3800169529077457	-0.927786	3.6878196976476385	0.4489033035773913	ANOVA followed by Tukey
5B	1	Drugs	GAD2-Cre	2.8188957177776106	1.3307270504922315	4.30706	< 0.0001	ANOVA followed by Tukey
5B	1	Control ketamine anesthesia	Control isoflurane anesthesia	0.15420681144787807	-3.16531	3.4737269809579385	1	ANOVA followed by Tukey
5B	1	Control ketamine anesthesia	Fluoxetine	0.36609583366788234	-2.78308	3.515269176023887	1	ANOVA followed by Tukey
5B	1	Control ketamine anesthesia	GAD2-Cre	4.565008504353239	1.9561801823154221	7.173836826391056	< 0.0001	ANOVA followed by Tukey
5B	1	Control isoflurane anesthesia	Fluoxetine	0.5203026451157604	-2.62887	3.669475987471765	0.9886	ANOVA followed by Tukey
5B	1	Control isoflurane anesthesia	GAD2-Cre	4.719215315801117	2.11039	7.328043637838934	< 0.0001	ANOVA followed by Tukey
5B	1	Fluoxetine	GAD2-Cre	4.198912670685356	1.8105944761626414	6.58723	< 0.0001	ANOVA followed by Tukey
5H	1	Drugs	Ketamine	1.2032172975871387	-2.36226	4.768692109485193	0.7982	ANOVA followed by Tukey
5H	1	Drugs	Control	0.11947652257261711	-3.446	3.6849513344706715	0.9997	ANOVA followed by Tukey
5H	1	Drugs	Fluoxetine	0.17213819783348727	-3.07337	3.417643698386101	0.9989	ANOVA followed by Tukey
5H	1	Ketamine	Control	1.3226938201597558	-3.34561	5.990996167011547	0.8689	ANOVA followed by Tukey
5H	1	Ketamine	Fluoxetine	1.3753554954206257	-3.05338	5.804095962128937	0.835	ANOVA followed by Tukey
5H	1	Control	Fluoxetine	0.0526617	-4.37608	4.4814021419691805	>0.9999	ANOVA followed by Tukey
5I	2	Drugs	Ketamine	1.8178962303614057	-0.831652	4.4674449063294475	0.2665003951145153	ANOVA followed by Tukey
5I	2	Drugs	Control	2.8113585692978846	0.1618098933298424	5.460907245265927	0.0341624	ANOVA followed by Tukey
5I	2	Drugs	Fluoxetine	2.1294798707851523	-0.282296	4.541255372084654	0.0992225	ANOVA followed by Tukey
5I	2	Ketamine	Control	0.993462	-2.47561	4.462535871820358	0.8653	ANOVA followed by Tukey
5I	2	Ketamine	Fluoxetine	0.31158364042374664	-2.97947	3.6026357607797723	0.994	ANOVA followed by Tukey
5I	2	Control	Fluoxetine	0.6818786985127323	-2.60917	3.972930818868758	0.943	ANOVA followed by Tukey
5K	3	Drugs	Ketamine	0.25180421141536913	-1.92601	2.4296202911529394	0.9892	ANOVA followed by Tukey
5K	3	Drugs	Control	1.5972799211158444	-0.580536	3.7750960008534147	0.21465307700088831	ANOVA followed by Tukey
5K	3	Drugs	Fluoxetine	1.5204750593342138	-0.461902	3.502851724117762	0.18245540815752304	ANOVA followed by Tukey
5K	3	Ketamine	Control	1.3454757097004753	-1.50595	4.196906291154589	0.5841	ANOVA followed by Tukey
5K	3	Ketamine	Fluoxetine	1.2686708479188447	-1.43643	3.9737754160948273	0.5888	ANOVA followed by Tukey
5K	3	Control	Fluoxetine	0.0768049	-2.6283	2.7819094299576133	0.9998	ANOVA followed by Tukey
7A	1	Control ketamine anesthesia	Control isoflurane anesthesia	3.44139	-0.655282	7.53806	0.0855859	unpaired t test, two-tailed
7A	2	Control ketamine anesthesia	Control isoflurane anesthesia	3.55056	0.29234	6.80878	0.0372019	unpaired t test, two-tailed
7G	1	cTRIO NAcLat cocaine	NAcLat iso saline controls	3.02232	0.76237	5.28228	0.0110253	ANOVA followed by Tukey
7G	1	cTRIO NAcLat cocaine	cTRIO NAcLat ketamine anesthesi	5.21921	2.95926	7.47917	0.001	ANOVA followed by Tukey
7G	1	NAcLat iso saline controls	cTRIO NAcLat ketamine anesthesi	2.19689	-0.18531	4.57909	0.070767	ANOVA followed by Tukey
7G	2	cTRIO NAcLat cocaine	NAcLat iso saline controls	1.78109	-1.89517	5.45735	0.41409	ANOVA followed by Tukey
7G	2	cTRIO NAcLat cocaine	cTRIO NAcLat ketamine anesthesi	1.15905	-2.51721	4.83531	0.66748	ANOVA followed by Tukey
7G	2	NAcLat iso saline controls	cTRIO NAcLat ketamine anesthesi	2.94014	-0.934975	6.81526	0.143913	ANOVA followed by Tukey
7M	1	cTRIO Amygdala cocaine 1 dose	cTRIO Amygdala isoflurane anest	0.616717	-3.73132	4.96475	0.9229	ANOVA followed by Tukey
7M	1	cTRIO Amygdala cocaine 1 dose	cTRIO Amygdala ketamine anesthe	1.8662	-2.23317	5.96556	0.462983	ANOVA followed by Tukey
7M	1	cTRIO Amygdala isoflurane anest	cTRIO Amygdala ketamine anesthe	1.24948	-3.09856	5.59751	0.7249	ANOVA followed by Tukey
7M	2	cTRIO Amygdala cocaine 1 dose	cTRIO Amygdala isoflurane anest	1.61004	-2.03034	5.25042	0.481914	ANOVA followed by Tukey
7M	2	cTRIO Amygdala cocaine 1 dose	cTRIO Amygdala ketamine anesthe	1.98028	-1.4519	5.41246	0.303662	ANOVA followed by Tukey
7M	2	cTRIO Amygdala isoflurane anest	cTRIO Amygdala ketamine anesthe	0.370245	-3.27014	4.01062	0.9595	ANOVA followed by Tukey
7, supplement 1A	3	Control ketamine anesthesia	Control isoflurane anesthesia	0.0117782	-3.6812	3.70475	0.994026	unpaired t test, two-tailed
7, supplement 1D	3	cTRIO NAcLat cocaine	NAcLat iso saline controls	2.13434	-0.905109	5.17379	0.182061	ANOVA followed by Tukey
7, supplement 1D	3	cTRIO NAcLat cocaine	cTRIO NAcLat ketamine anesthesi	0.325165	-2.71428	3.36461	0.95	ANOVA followed by Tukey
7, supplement 1D	3	NAcLat iso saline controls	cTRIO NAcLat ketamine anesthesi	2.4595	-0.744355	5.66336	0.13855	ANOVA followed by Tukey
7, supplement 1F	3	cTRIO Amygdala cocaine 1 dose	cTRIO Amygdala isoflurane anest	1.59586	-0.914384	4.10611	0.242545	ANOVA followed by Tukey
7, supplement 1F	3	cTRIO Amygdala cocaine 1 dose	cTRIO Amygdala ketamine anesthe	1.73804	-0.628642	4.10472	0.162444	ANOVA followed by Tukey
7, supplement 1F	3	cTRIO Amygdala isoflurane anest	cTRIO Amygdala ketamine anesthe	3.3339	0.823655	5.84414	0.0109259	ANOVA followed by Tukey
7, supplement 1H	3	cTRIO NAcMed cocaine 1 inj	NAcMed controls	0.329923	-2.57844	3.23828	0.9484	ANOVA followed by Tukey
7, supplement 1H	3	cTRIO NAcMed cocaine 1 inj	cTRIO NAcMed ketamine anesthesi	1.8204	-1.08796	4.72876	0.247034	ANOVA followed by Tukey
7, supplement 1H	3	NAcMed controls	cTRIO NAcMed ketamine anesthesi	2.15032	-0.915361	5.216	0.182659	ANOVA followed by Tukey
7, supplement 1J	3	cTRIO mPFC isoflurane anesthesi	cTRIO mPFC cocaine 1 dose	2.63359	-0.414173	5.68136	0.0913876	ANOVA followed by Tukey
7, supplement 1J	3	cTRIO mPFC isoflurane anesthesi	cTRIO mPFC ketamine anesthesia	2.13173	-0.759635	5.0231	0.157522	ANOVA followed by Tukey
7, supplement 1J	3	cTRIO mPFC cocaine 1 dose	cTRIO mPFC ketamine anesthesia	0.501863	-2.3895	3.39323	0.883403	ANOVA followed by Tukey
7, supplement 2A	1	cTRIO NAcMed cocaine 1 inj	NAcMed controls	0.869132	-3.51049	5.24876	0.8519	ANOVA followed by Tukey
7, supplement 2A	1	cTRIO NAcMed cocaine 1 inj	cTRIO NAcMed ketamine anesthesi	0.742837	-3.63679	5.12246	0.88944	ANOVA followed by Tukey
7, supplement 2A	1	NAcMed controls	cTRIO NAcMed ketamine anesthesi	1.61197	-3.00456	6.2285	0.615836	ANOVA followed by Tukey
7, supplement 2A	2	cTRIO NAcMed cocaine 1 inj	NAcMed controls	1.3272	-1.8643	4.5187	0.514229	ANOVA followed by Tukey
7, supplement 2A	2	cTRIO NAcMed cocaine 1 inj	cTRIO NAcMed ketamine anesthesi	1.95477	-1.23674	5.14627	0.260235	ANOVA followed by Tukey
7, supplement 2A	2	NAcMed controls	cTRIO NAcMed ketamine anesthesi	0.627564	-2.73657	3.9917	0.863638	ANOVA followed by Tukey
7, supplement 2E	1	cTRIO mPFC isoflurane anesthesi	cTRIO mPFC cocaine 1 dose	0.636795	-4.68712	5.96071	0.9429	ANOVA followed by Tukey
7, supplement 2E	1	cTRIO mPFC isoflurane anesthesi	cTRIO mPFC ketamine anesthesia	1.66331	-3.3874	6.71401	0.6512	ANOVA followed by Tukey
7, supplement 2E	1	cTRIO mPFC cocaine 1 dose	cTRIO mPFC ketamine anesthesia	1.02651	-4.0242	6.07722	0.8454	ANOVA followed by Tukey
7, supplement 2E	2	cTRIO mPFC isoflurane anesthesi	cTRIO mPFC cocaine 1 dose	0.369592	-3.88686	4.62604	0.9694	ANOVA followed by Tukey
7, supplement 2E	2	cTRIO mPFC isoflurane anesthesi	cTRIO mPFC ketamine anesthesia	0.210663	-3.82736	4.24869	0.9888	ANOVA followed by Tukey
7, supplement 2E	2	cTRIO mPFC cocaine 1 dose	cTRIO mPFC ketamine anesthesia	0.158929	-3.87909	4.19695	0.9936	ANOVA followed by Tukey
